# Supplementary material for: E6^E7, a Novel Splice Isoform Protein of Human Papillomavirus 16, Stabilizes Viral E6 and E7 Oncoproteins via HSP90 and GRP78
Source: PubMed Central journal article supplement — mBio. 2015 Feb 17;6(1):e02068-14. doi: 10.1128/mBio.02068-14 (PMC4337564; doi:10.1128/mbio.02068-14), 2015-02-17
Supplement: mbo001152166st1.pdf [file mbo001152166st1.pdf]

Table S1. Peptides identified by LC-MS/MS analysis.

| Peptide Mass | Identified Peptide Sequence | Corresponding Protein |               |
|--------------|-----------------------------|-----------------------|---------------|
| 2014.04      | VILHLKEDQTEYLEER            | HSP90 $\alpha$        | HSP90 $\beta$ |
| 1846.79      | NPDDITQEEYGEFYK             |                       | HSP90 $\beta$ |
| 1781.94      | HLEINPDHPIVETLR             |                       | HSP90 $\beta$ |
| 1347.66      | HFSVEGQLEFR                 | HSP90 $\alpha$        | HSP90 $\beta$ |
| 1543.82      | ELISNASDALDKIR              |                       | HSP90 $\beta$ |
| 1512.78      | GVVDSDELPLNISR              | HSP90 $\alpha$        | HSP90 $\beta$ |
| 1241.7       | ADLINNLGTIAK                | HSP90 $\alpha$        | HSP90 $\beta$ |
| 1807.95      | HSQFIGYPITLVLEK             |                       | HSP90 $\beta$ |

| Peptide Mass | Identified Peptide Sequence | Corresponding Protein |  |
|--------------|-----------------------------|-----------------------|--|
| 1190.63      | VYGERPLTK                   | GRP78                 |  |
| 1429.68      | TWNDPSVQQDIK                | GRP78                 |  |
| 1731.95      | KTKPYIQVDIGGGQTK            | GRP78                 |  |
| 2174.98      | LYGSAGPPPTGEEDTAEKDEL       | GRP78                 |  |
| 1603.86      | TKPYIQVDIGGGQTK             | GRP78                 |  |
| 1964.02      | KSQIFSTASDNQPTVTIK          | GRP78                 |  |
| 1676.8       | NQLTSNPENTVFDK              | GRP78                 |  |
| 1835.93      | SQIFSTASDNQPTVTIK           | GRP78                 |  |
| 1565.77      | ITPSYVAFTPEGER              | GRP78                 |  |
| 2015.06      | VTHAVVTVPAYFNDAQR           | GRP78                 |  |
| 1315.63      | NELESYAYSLK                 | GRP78                 |  |
| 1587.85      | KSDIDEIVLVGGSTR             | GRP78                 |  |
| 1652.97      | KKELEEIVQPIISK              | GRP78                 |  |
| 1886.96      | VTHAVVTVPAYFNDAQR           | GRP78                 |  |
| 1459.75      | SDIDEIVLVGGSTR              | GRP78                 |  |
| 1396.78      | ELEEIVQPIISK                | GRP78                 |  |
| 1814.99      | IINEPTAAAIAYGLDKR           | GRP78                 |  |
| 1933.01      | DNHLLGTFDLTGIPPAPR          | GRP78                 |  |
| 2163.98      | IEIESFYEGEDFSETLTR          | GRP78                 |  |
