# Supplementary material for: E6^E7, a Novel Splice Isoform Protein of Human Papillomavirus 16, Stabilizes Viral E6 and E7 Oncoproteins via HSP90 and GRP78
Source: PubMed Central journal article supplement — mBio. 2015 Feb 17;6(1):e02068-14. doi: 10.1128/mBio.02068-14 (PMC4337564; doi:10.1128/mbio.02068-14), 2015-02-17
Supplement: mbo001152166st2.pdf [file mbo001152166st2.pdf]

Table S2. Summarized data of HPV16 E6 splice isoform-specific real-time RT-PCR.

| Sample | Ct value  |         |         |         | Log2(Ct value) |         |         |         | Relative copy number |         |         |         | Relative abundance |         |         |         |
|--------|-----------|---------|---------|---------|----------------|---------|---------|---------|----------------------|---------|---------|---------|--------------------|---------|---------|---------|
|        | Unspliced | 226^409 | 226^526 | 226^742 | Unspliced      | 226^409 | 226^526 | 226^742 | Unspliced            | 226^409 | 226^526 | 226^742 | Unspliced          | 226^409 | 226^526 | 226^742 |
| CaSki  | 27.544    | 24.052  | 27.951  | 33.368  | 14.741         | 16.744  | 13.460  | 9.493   | 27,376               | 109,724 | 11,267  | 721     | 18.40%             | 73.60%  | 7.60%   | 0.50%   |
| SiHa   | 27.720    | 26.817  | 30.265  | 35.910  | 14.581         | 14.132  | 11.306  | 7.221   | 24,510               | 17,955  | 2,532   | 149     | 54.30%             | 39.80%  | 5.60%   | 0.30%   |
| 20861  | 24.954    | 20.954  | 25.143  | 31.365  | 17.075         | 19.671  | 16.073  | 11.284  | 138,054              | 834,296 | 68,941  | 2,493   | 13.20%             | 79.90%  | 6.60%   | 0.20%   |
| 20863  | 26.082    | 24.177  | 28.456  | 33.458  | 16.058         | 16.626  | 12.990  | 9.413   | 68,203               | 101,139 | 8,137   | 682     | 38.30%             | 56.80%  | 4.60%   | 0.40%   |
| T1     | 38.533    | 35.341  | 36.656  | 38.445  | 4.835          | 6.081   | 5.360   | 4.955   | 29                   | 68      | 41      | 31      | 17.00%             | 40.20%  | 24.40%  | 18.40%  |
| T2     | 35.742    | 32.932  | 35.647  | 41.359  | 7.351          | 8.357   | 6.299   | 2.350   | 163                  | 328     | 79      | 5       | 28.40%             | 57.00%  | 13.70%  | 0.90%   |
| T3     | 26.131    | 25.421  | 28.384  | 34.839  | 16.014         | 15.451  | 13.056  | 8.178   | 66,155               | 44,792  | 8,520   | 290     | 55.20%             | 37.40%  | 7.10%   | 0.20%   |
| T4     | 35.776    | 32.388  | 33.962  | 40.621  | 7.320          | 8.870   | 7.867   | 3.010   | 160                  | 468     | 233     | 8       | 18.40%             | 53.80%  | 26.90%  | 0.90%   |
| T5     | 31.456    | 28.604  | 29.474  | 38.750  | 11.215         | 12.444  | 12.043  | 4.682   | 2,376                | 5572    | 4220    | 26      | 19.50%             | 45.70%  | 34.60%  | 0.20%   |
| T6     | 27.779    | 26.266  | 28.802  | 34.409  | 14.529         | 14.653  | 12.668  | 8.563   | 23,632               | 25,761  | 6,509   | 378     | 42.00%             | 45.80%  | 11.60%  | 0.70%   |
| T7     | 25.479    | 24.999  | 27.176  | 33.446  | 16.602         | 15.850  | 14.180  | 9.424   | 99,435               | 59,033  | 18,568  | 687     | 55.90%             | 33.20%  | 10.40%  | 0.40%   |
| T8     | 35.620    | 33.577  | 33.925  | 36.588  | 7.461          | 7.747   | 7.901   | 6.615   | 176                  | 215     | 239     | 98      | 24.20%             | 29.50%  | 32.80%  | 13.50%  |
| T9     | 32.204    | 28.905  | 31.420  | 36.399  | 10.540         | 12.160  | 10.232  | 6.783   | 1,489                | 4,577   | 1,203   | 110     | 20.20%             | 62.00%  | 16.30%  | 1.50%   |
