# Supplementary material for: E6^E7, a Novel Splice Isoform Protein of Human Papillomavirus 16, Stabilizes Viral E6 and E7 Oncoproteins via HSP90 and GRP78
Source: PubMed Central journal article supplement — mBio. 2015 Feb 17;6(1):e02068-14. doi: 10.1128/mBio.02068-14 (PMC4337564; doi:10.1128/mbio.02068-14), 2015-02-17
Supplement: mbo001152166st3.pdf [file mbo001152166st3.pdf]

Table S3. A list of plasmids (A) and DNA oligos (B) used in this study.

| Name               | Parental plasmid | Characteristics and cloning site                                     | Plasmid construction                                                                                                                           |
|--------------------|------------------|----------------------------------------------------------------------|------------------------------------------------------------------------------------------------------------------------------------------------|
| FLAG-E6*E7 (pMA15) | p3XFLAGCMV14     | HPV16 E6*E7, EcoRI/Asp718                                            | Insert was amplified using a primer pair of oZM2411/oZM2431 from pTMF51                                                                        |
| HA-E6*E7 (pMA48)   | pSG5L-HA         | HPV16 E6*E7, BamHI/XhoI                                              | Insert was amplified using a primer pair of oMA130/oSB29 from pMA15                                                                            |
| HA-HSP90β          | pcDNA3           | Human HSP90β, NotI                                                   | Purchased from addgene (#22487) (Garcia-Cardena et al., 1998)                                                                                  |
| Myc-GRP78          | pcDNA3           | Human GRP78, HindIII/XbaI                                            | Purchased from addgene (#27164)                                                                                                                |
| HPV16 E6E7 (pMA16) | pEGFP-N1         | HPV16 nt 81-880, XhoI/Asp718                                         | (Ajro et al., 2012)                                                                                                                            |
| GFP-E6 (pZM270)    | pEGFP-C1         | HPV16 nt 81-880, XhoI/Asp718                                         | (Tao et al., 2003)                                                                                                                             |
| GFP-E671 (pZM271)  | pEGFP-C1         | HPV16 nt 81-227/408-559, XhoI/Asp718                                 | (Tao et al., 2003)                                                                                                                             |
| GFP-E7 (pZM274)    | pEGFP-C1         | HPV16 nt 560-880, XhoI/Asp718                                        | (Tao et al., 2003)                                                                                                                             |
| pMA51              | pMA16            | HPV16 nt 81-880 (A716G), XhoI/Asp718                                 | Mutation was created by PCR by oZM2209/oMA162 and oMA163/oZM2262 from pMA16, following annealing and PCR by oZM2209/oZM2262                    |
| pMA52              | pMA16            | HPV16 nt 81-880 (A718G), XhoI/Asp718                                 | Mutation was created by PCR by oZM2209/oMA164 and oMA165/oZM2262 from pMA16, following annealing and PCR by oZM2209/oZM2262                    |
| pMA53              | pMA16            | HPV16 nt 81-880 (A716G, A718G), XhoI/Asp718                          | Mutation was created by PCR by oZM2209/oMA166 and oMA167/oZM2262 from pMA16, following PCR by oZM2209/oZM2262                                  |
| pMA54              | pMA16            | HPV16 nt 81-880 (A716G, A718G, A719G, A721G), XhoI/Asp718            | PCR fragments by oZM2209/oMA168 and oMA169/oZM2262 from pMA16 were annealed and followed by PCR by oZM2209/oZM2262                             |
| pMA58              | pMA16            | HPV16 nt 81-350/680-885, XhoI/NotI                                   | PCR fragments by oZM212/oMA217 and oMA215/oZM2262 from pMA16 were annealed and followed by PCR by oZM2217/oZM2262                              |
| pMA59              | pMA58            | HPV16 nt 81-350/680-885(A716G), XhoI/NotI                            | PCR fragments by oZM212/oMA217 and oMA215/oZM2262 from pMA51 were annealed and followed by PCR by oZM2217/oZM2262                              |
| pMA60              | pMA58            | HPV16 nt 81-350/680-885(A718G), XhoI/NotI                            | PCR fragments by oZM212/oMA217 and oMA215/oZM2262 from pMA52 were annealed and followed by PCR by oZM2217/oZM2262                              |
| pMA61              | pMA58            | HPV16 nt 81-350/680-885(A716G, A718G), XhoI/NotI                     | PCR fragments by oZM212/oMA217 and oMA215/oZM2262 from pMA53 were annealed and followed by PCR by oZM2217/oZM2262                              |
| pMA63              | pMA58            | HPV16 nt 81-350/680-885+β-globin nt 146-484, XhoI/NotI               | PCR fragments by oZM2262/oMA238 from pMA58 and oMA239/oZM2240 from human β-globin plasmid were annealed and followed by PCR by oZM2262/oZM2240 |
| pMA65              | pMA59            | HPV16 nt 81-350/680-885(A716G)+β-globin nt 146-484, XhoI/NotI        | PCR fragments by oZM2262/oMA238 from pMA58 and oMA239/oZM2240 from human β-globin plasmid were annealed and followed by PCR by oZM2262/oZM2240 |
| pMA66              | pMA60            | HPV16 nt 81-350/680-885(A718G)+β-globin nt 146-484, XhoI/NotI        | PCR fragments by oZM2262/oMA238 from pMA58 and oMA239/oZM2240 from human β-globin plasmid were annealed and followed by PCR by oZM2262/oZM2240 |
| pMA67              | pMA61            | HPV16 nt 81-350/680-885(A716G, A718G)+β-globin nt 146-484, XhoI/NotI | PCR fragments by oZM2262/oMA238 from pMA58 and oMA239/oZM2240 from human β-globin plasmid were annealed and followed by PCR by oZM2262/oZM2240 |

| Name (alternative name) | Position                                   | Restriction enzyme site | Sequence (5' to 3')                 |
|-------------------------|--------------------------------------------|-------------------------|-------------------------------------|
| oMA31 (R4)              | HPV16, nt 267-245                          |                         | CTATATACTATGCATAAATCCCG             |
| oMA130A                 | HPV16, nt 104-121                          | BamHI                   | CATGGATCCGCCACC/ATGTTTCAGGACCCACAG  |
| oMA162                  | HPV16, nt 711-735                          |                         | CCATT@CAATATTGTAACCTTTTGT           |
| oMA163                  | HPV16, nt 729-695                          |                         | GGTTACAATATTGGAATGGGCTCTGTCGGGTTCTG |
| oMA164                  | HPV16, nt 711-737                          |                         | CCATTACGATATTGTAACCTTTTGTG          |
| oMA165                  | HPV16, nt 729-695                          |                         | GGTTACAATATTGGAATGGGCTCTGTCGGGTTCTG |
| oMA166                  | HPV16, nt 711-737                          |                         | CCATT@CGATATTGTAACCTTTTGTG          |
| oMA167                  | HPV16, nt 729-695                          |                         | GGTTACAATATTGGAATGGGCTCTGTCGGGTTCTG |
| oMA168                  | HPV16, nt 711-745                          |                         | CCATT@CGGTTGTTGTAACCTTTTGTGCAAGTGTG |
| oMA169                  | HPV16, nt 729-695                          |                         | GGTTACAACACCGGAATGGGCTCTGTCGGGTTCTG |
| oMA222                  | HPV16, nt 217-186 (6-FAM+TAMRA)            |                         | CAGTAACTGTTGCTTGCAGTACACACATTCTA    |
| oMA213                  | HPV16, nt 245-220                          |                         | GAAAAGCAAAGTCATATACCTCACGT          |
| oMA214                  | HPV16, nt 541-526/226-220                  |                         | ACGTGTTCTTGATGATCTCACGT             |
| oMA215                  | HPV16, nt 691-680/350-333                  |                         | GTCCAGCTGGAC/AACTATAACAATAATGTC     |
| oMA216                  | HPV16, nt 755-742/226-220                  |                         | AGCGTAGAGTCAC/CTCACGT               |
| oMA217                  | HPV16, nt 885-868                          | Not I                   | CTAG@GGCCGG/GGTACTGCAGGATCAGC       |
| oMA233                  | HPV16, nt 428-409/226-220                  |                         | GCTTTTGCAGTAAATACACCTCACGT          |
| oMA238                  | Human β-globin nt 146-165/HPV16 nt 871-880 |                         | ATCCCTGCAG/GTTGGATCAAGGTTACAAG      |
| oMA239                  | Human β-globin nt 153-146/HPV16 nt 880-871 |                         | ATACCAA@CTGCAGGATCAGCCATGG          |
| oMA241                  | HPV18, nt 804-791/233-227                  |                         | ATTCTGGCTTCA@CTCTGTA                |
| oSB29                   | HPV16, nt 858-840                          | Xho I                   | AGTCG@TCGAG/TTATGGTTTCTGAGAACAG     |
| oSB56                   | HPV16, nt 525-504                          |                         | CTGCA@CAAGACATACATCGAC              |
| oZM2209                 | HPV16, nt 902-885                          |                         | GTACCCTCTTCC@CATG                   |
| oZM2211                 | HPV16, nt 718-701                          |                         | TGTAA@GGCTCTGCTCCG                  |
| oZM2212                 | HPV16, nt 625-608                          |                         | GATCAGTGTCTCTG@TTGTC                |
| oZM2217                 | HPV16, nt 429-409+U1 binding site          |                         | GTACTCACCC@GGCTTTTGACAGTAAATACAC    |
| oZM2220                 | HPV16, nt 540-522                          |                         | CSTGTTCTTGATG@TCTGC                 |
| oZM2237 (F3)            | HPV16, nt 108-125                          |                         | GTTTCAGGACCC@CAGGAGC                |
| oZM2240                 | CMV IE promoter                            |                         | GACTTTC@ACTTGGCAG                   |
| oZM2252                 | HPV18, nt 121-140                          |                         | ATCC@ACACGGCAGCCCTAC                |
| oZM2262                 | HPV16, nt 81-99                            | Xho I                   | ATTCG@CTCAGG/TTATGCACAAAGAGAAC      |
| oZM2264 (R3)            | HPV16, nt 289-272                          |                         | TACAG@ATATGGATTCCC                  |
| oZM2269                 | Human GAPDH nt 202-225                     |                         | GTCA@CAATGGAATCCCATCACC             |
| oZM2270                 | Human GAPDH nt 523-502                     |                         | TGAGTCC@TTCACGATACCAAA              |
| oZM2296                 | pEGFP-C1 plasmid nt 880-862                |                         | GCATGG@CGGACTTGAAGAA                |
| oZM2301 (F2)            | HPV16, nt 562-581                          |                         | CACC@ATGCATGGAGATACACCTAC           |
| oZM2302 (R1)            | HPV16, nt 855-836                          |                         | TGTTTTCTG@AGACAGATGG                |
| oZM2359                 | HPV16, nt 762-742/226-221                  |                         | CAACCGA@GCGTAGAGTCACTCACG           |
| oZM2380                 | HPV16, nt 791-773                          |                         | CGAATG@TCACTGTGTGTC                 |
| oZM2381 (F1)            | HPV16, nt 205-223                          |                         | GCAACAGT@TCTGCGACGT                 |
| oZM2411                 | HPV16, nt 104-121                          | EcoRI                   | ATCGGA@TTCACCA/ATGTTTCAGGACCCACAG   |
| oZM2413                 | HPV16, nt 211-226/409-411                  |                         | GTTACTG@GACGTGAG/GTG                |
| oZM2414                 | HPV16, nt 211-226/526-528                  |                         | GTTACTG@GACGTGAG/ATC                |
| oZM2417 (R2)            | HPV16, nt 374-356                          |                         | GCTGTT@TAATGTTGTTCC                 |
| oZM2431                 | HPV16, nt 854-835                          | Asp718                  | CACTGAGG@TACC/GGTTTCTGAGA@ACAGATGGG |

\* mutated nucleotide(s) and restriction enzyme cutting sites are underlined.
